# Supplementary material for: Synthesis and characterization of the crystal structure and magnetic properties of the hydroxyfluoride MnF2−x(OH)x (x ∼ 0.8)
Source: Royal Society of Chemistry journal article supplement (doi:10.1039/c3cp50740h), 2013-01-01
Supplement: c3cp50740h.pdf [file c3cp50740h.pdf]

Cite this: DOI: 10.1039/c0xx00000x

www.rsc.org/materials

## Supporting Information

Synthesis and Characterization of the Crystal Structure and Magnetic Properties of the Hydroxyfluorides  $\text{MnF}_{2-x}(\text{OH})_x$  ( $x \sim 0.8$ )Hamdi Ben Yahia<sup>a,\*</sup>, Masahiro Shikano<sup>a,\*</sup>, Hironori Kobayashi<sup>a</sup>, Maxim Avdeev<sup>b</sup>, Samuel Liu<sup>c</sup>, Chris D. Ling<sup>c</sup><sup>5</sup> Received (in XXX, XXX) Xth XXXXXXXXXX 2011, Accepted Xth XXXXXXXXXX 20XX

DOI: 10.1039/b000000x

## Electronic Supplementary Information (ESI)

<sup>10</sup> **Table S1.** Crystal structural parameters for  $\text{MnF}_{1.20(1)}(\text{OH})_{0.80(1)}$  at 3 K based on Rietveld refinement against NPD data. Space group *Pnn2* (No 34),  $a = 4.71143(10)$  Å,  $b = 5.24377(11)$  Å,  $c = 3.24834(6)$  Å,  $V = 80.252(3)$  Å<sup>3</sup>.

| Atom | Wyck.        | <i>x</i>   | <i>y</i>   | <i>z</i> | Occupancy         | $B_{\text{iso}}$ , Å <sup>2</sup> |
|------|--------------|------------|------------|----------|-------------------|-----------------------------------|
| Mn   | 2 <i>a</i> * | 0          | 0          | 0        | 1                 | 0.21(6)                           |
| O/F  | 4 <i>c</i>   | 0.2511(6)  | 0.1533(3)  | 0.504(5) | 0.399(8)/0.601(8) | 0.49(3)                           |
| H    | 4 <i>c</i>   | 0.4250(11) | 0.0287(13) | 0.543(5) | 0.399(8)          | 0.49(3)                           |

\* *z*(Mn) was kept at 0 to fix the unit cell origin as all the sites in the *Pnn2* space group have variable *z*-coordinates

<sup>15</sup>

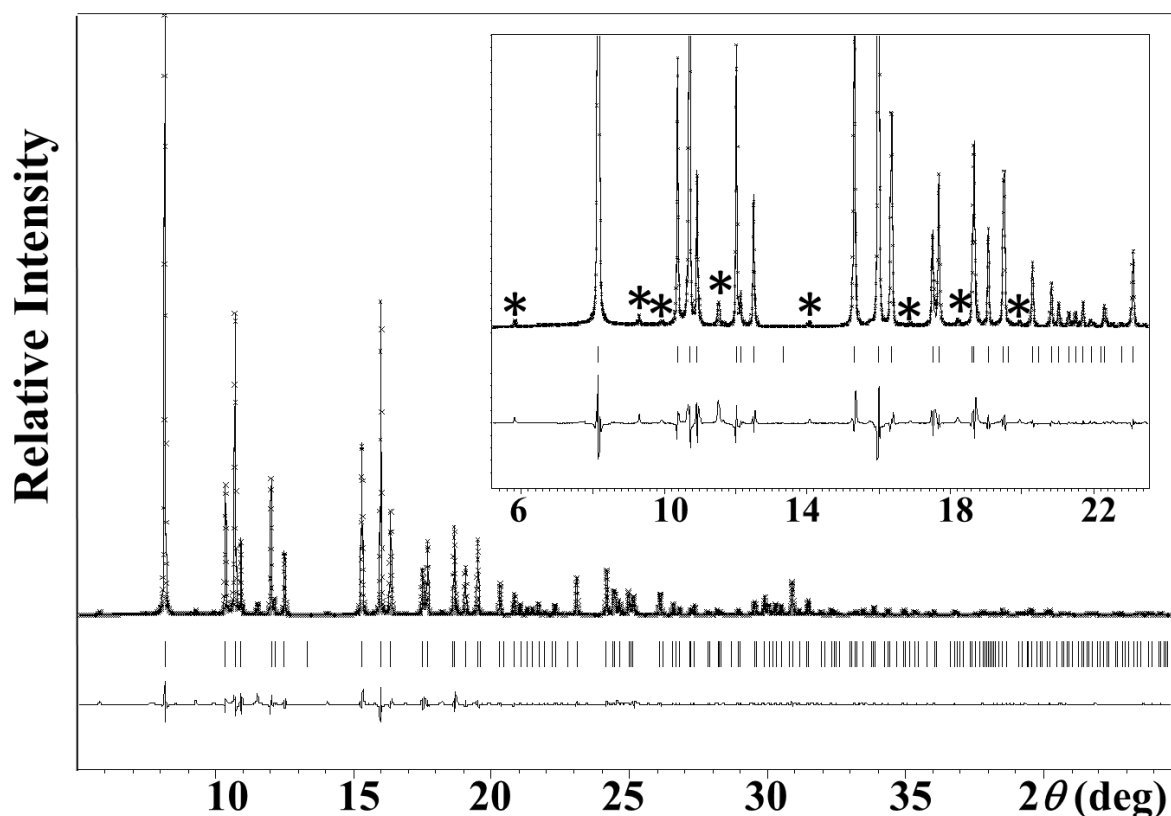

**Figure S1.** Final observed, calculated and difference plots for synchrotron X-ray powder diffraction refinement ( $\lambda = 0.5001 \text{ \AA}$ ) of  $\text{MnF}_{2-x}(\text{OH})_x$  ( $x \sim 0.8$ ). The asterisk in the inset corresponds to  $\text{Mn}_3\text{O}_4$ .

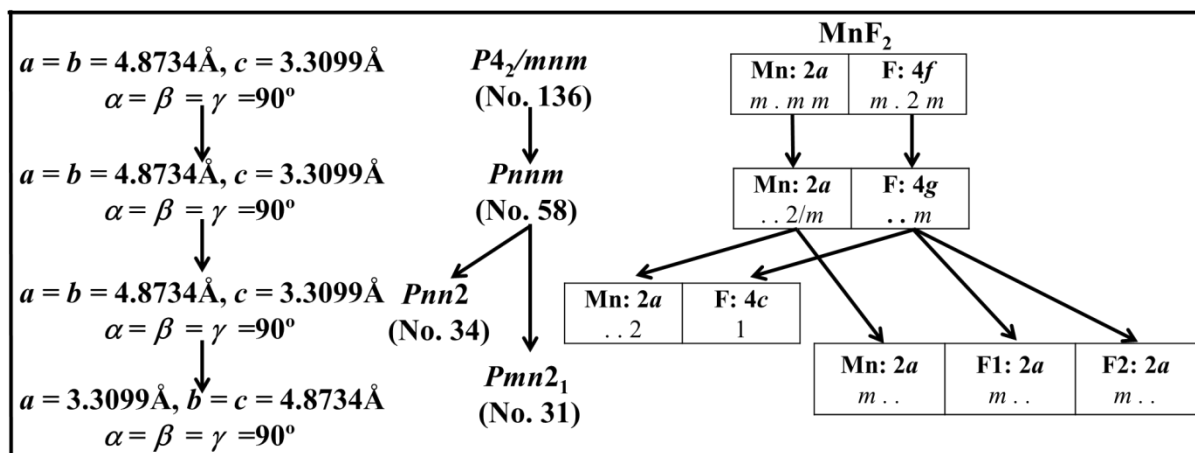

**Figure S2.** Group-subgroup transformation from tetragonal  $P4_2/mnm$  to orthorhombic  $Pnmm$ ,  $Pnn2$ , and  $Pmn2_1$ , for  $\text{MnF}_2$  structure.

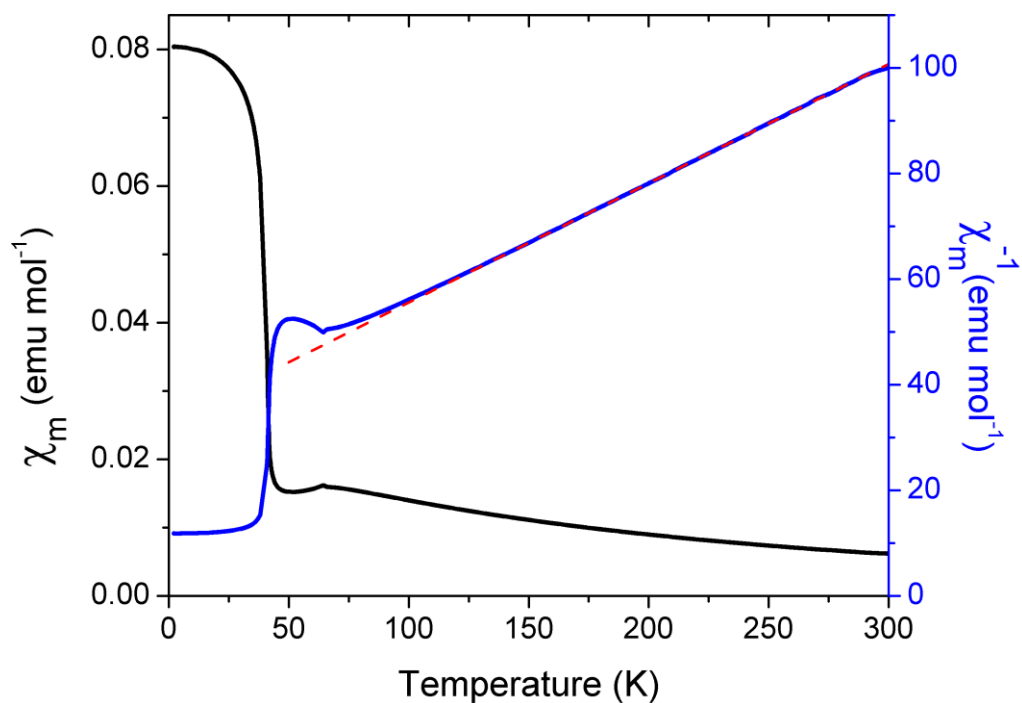

**Figure S3.** Magnetic susceptibility  $\chi_m$  and the corresponding  $\chi_m^{-1}$  as a function of temperature under 0.1 T field for  $\text{MnF}_{1.20(1)}(\text{OH})_{0.80(1)}$ . The signature of the AFM transition can be seen at  $\sim 70$  K. The anomaly at  $\sim 40$  K is due to a ferrimagnetic transition in the minor impurity phase  $\text{Mn}_3\text{O}_4$ . Red dashed line shows the Curie-Weiss fit done in the range 200-300K and yielding  $\Theta = -146(1)$  K and the effective moment  $5.95(1) \mu_B$  consistent with the spin-only value for  $S=5/2 \text{ Mn}^{2+}$ .

## Thermal analyses

Thermal analyses (TG-DTA-MS) were carried out on the  $\text{MnF}_{2-x}(\text{OH})_x$  ( $x \sim 0.8$ ) sample using a Rigaku TG-DTA-PIMS410/s instrument. The measurements were done between 25 °C and 600 °C at a heating rate of 5 °C/min. The experiment was performed in alumina crucible under helium atmosphere. We clearly observe 7.7% of weight loss. Based on the mass spectrometer analysis, this loss corresponds to water molecules (18g/mol). Furthermore, the examination using X-ray diffraction of the powder collected after the thermal analysis shows a decomposition of the sample to a mixture of MnO and  $\text{MnF}_2$ . Therefore, the decomposition mechanism is as follow:

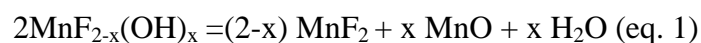

If we consider  $y$  the % of  $\text{H}_2\text{O}$  weight loss then:  $y = \frac{x \times M(\text{H}_2\text{O})}{2 \times [M(\text{Mn}) + (2-x) \times M(\text{F}) + x \times M(\text{OH})]} \times 100$  (eq. 2)

We then deduce from eq. 2:  $x = \frac{M(\text{MnF}_2)}{\left(\frac{50}{y}\right) \times [M(\text{H}_2\text{O})] + [M(\text{F}) - M(\text{OH})]}$  (eq. 3)

For  $y = 7.7\%$ ,  $x$  would be equal to 0.782. This is in very good agreement with the composition  $x = 0.8$  determined from Rietveld refinement.

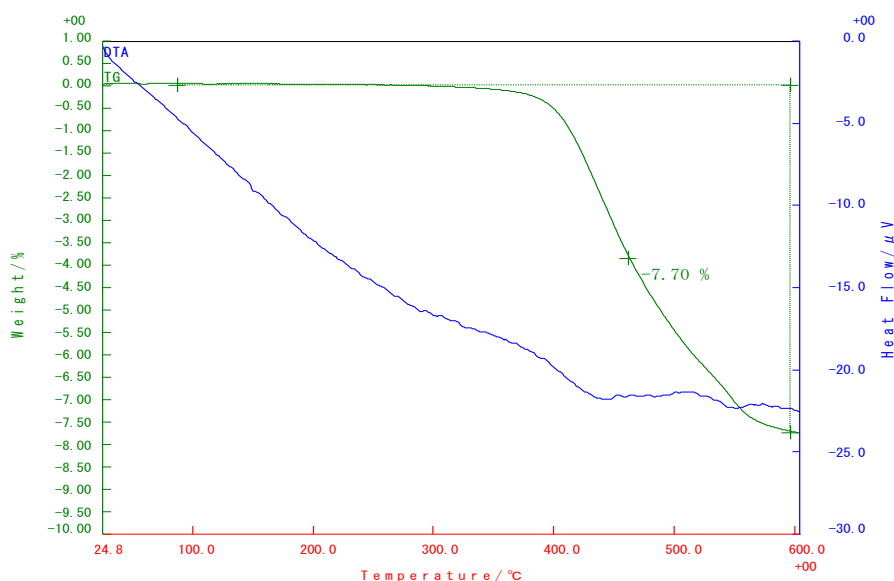

**Figure S4.** DT and TG thermal analyses for  $\text{MnF}_{2-x}(\text{OH})_x$  ( $x \sim 0.8$ ) sample.
